# Supplementary material
Source: MDPI journal article supplement (https://www.mdpi.com/2073-4441/8/6/228)
Supplement: s1 [file s1]

# Supplementary Materials: Climate and Land Use Changes on Streamflow and Subsurface Recharge in the Fluvià Basin, Spain

Lucila Candela, Karim Tamoh, Gonzalo Olivares and Manuel Gómez

## File S1: Historical and Downscaled Data

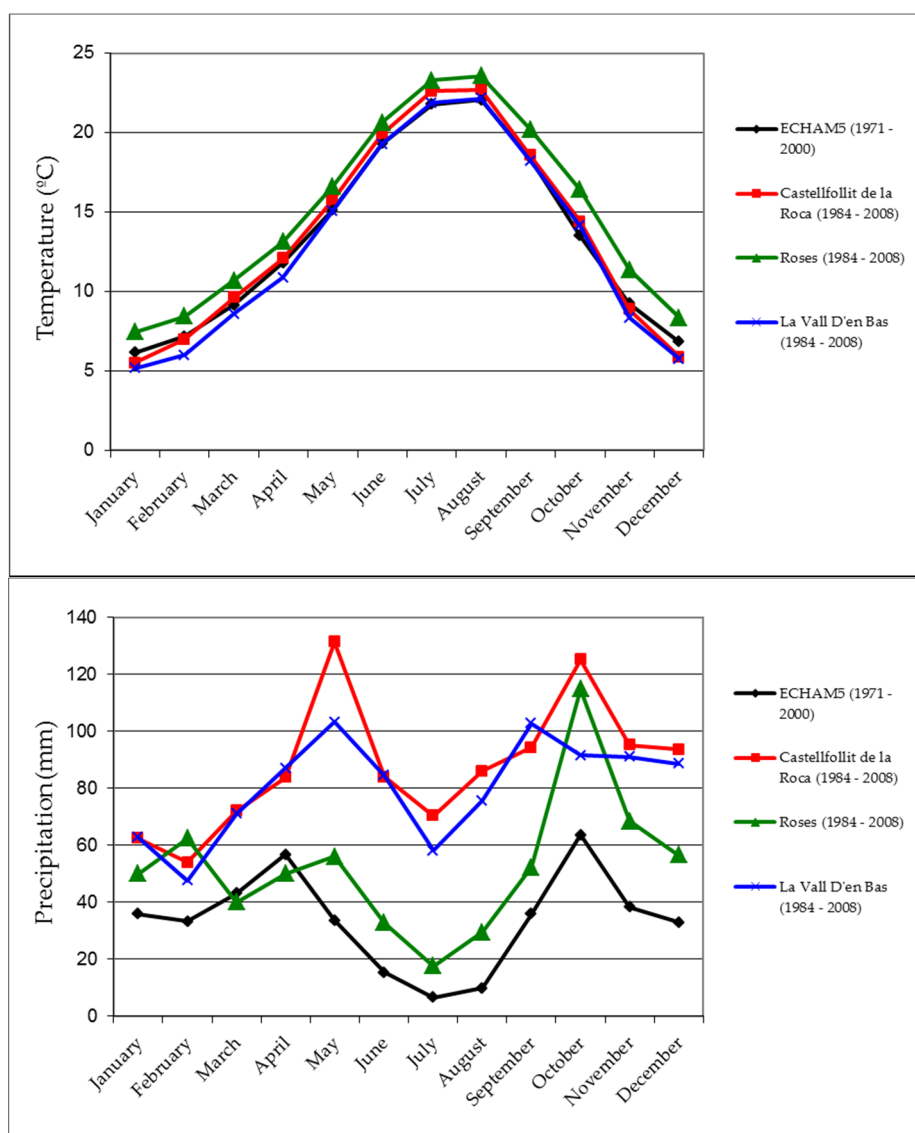

**Figure 1.** Monthly temperature (°C) and precipitation (mm) at the three meteorological stations in the Fluvià basin for the historical period (1984) and values simulated with ECHAM5 for the reference period (1971–2000).

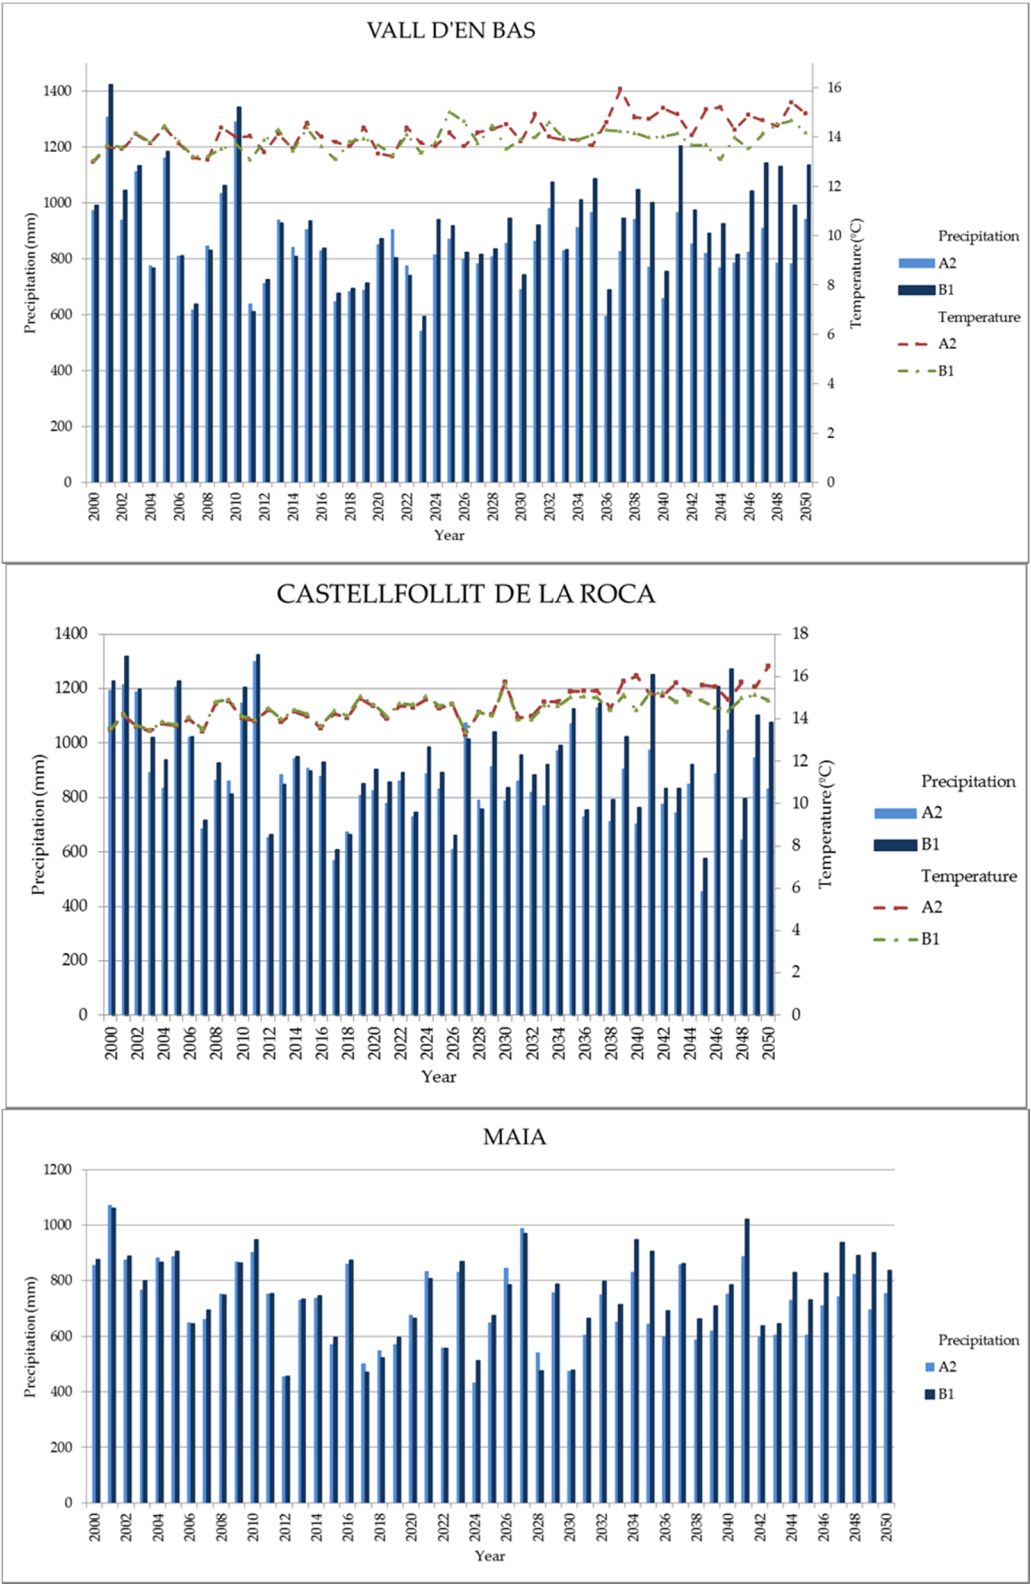

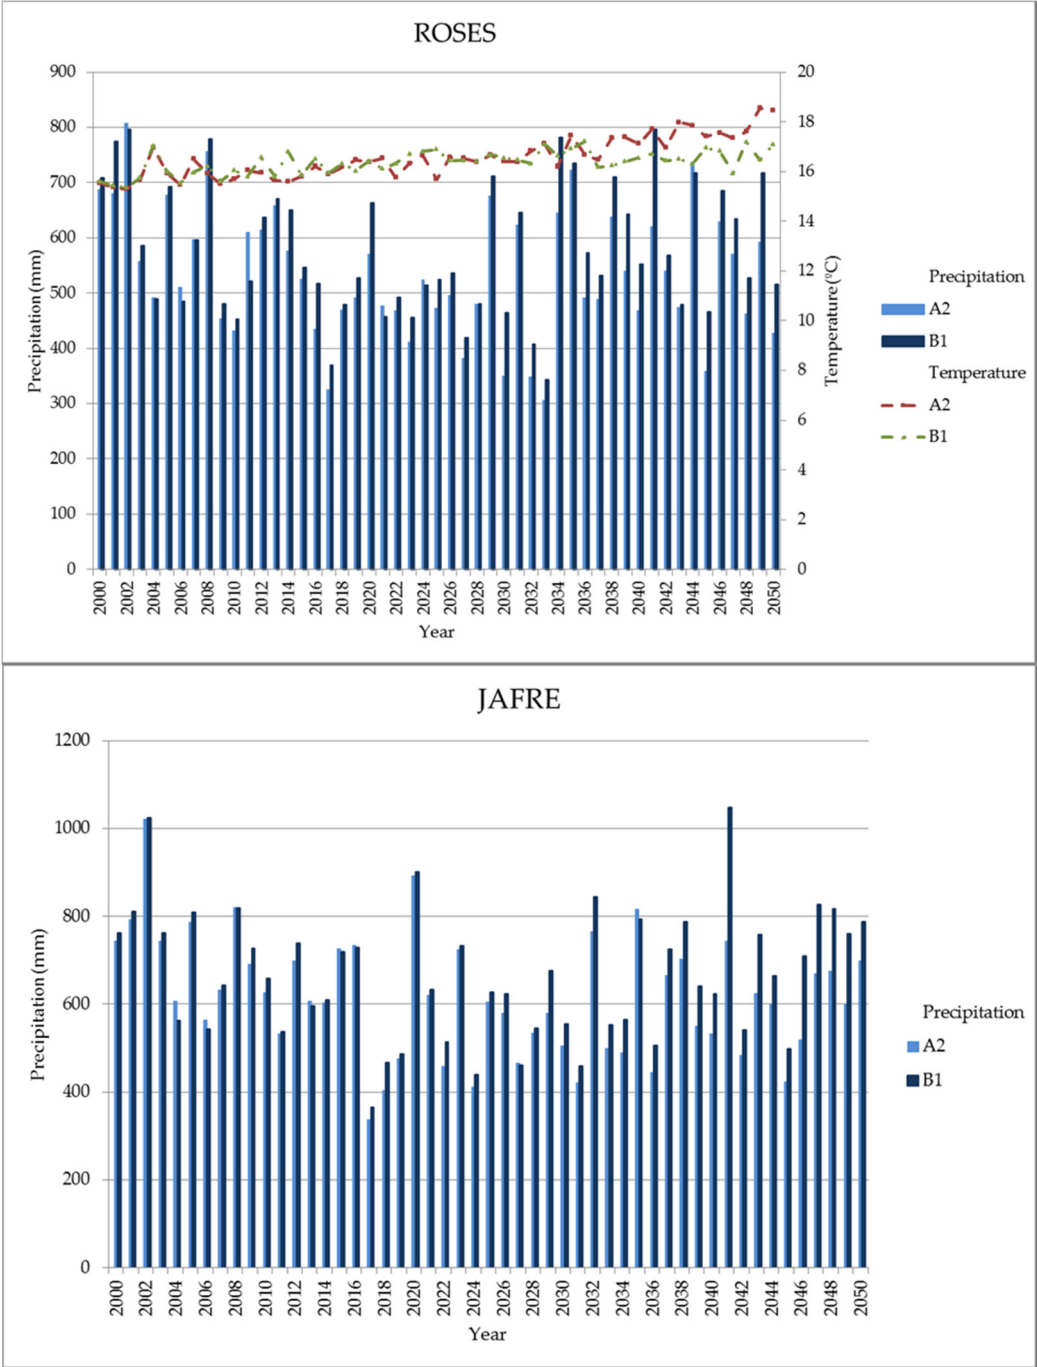

Figure 2. Downscaled P and T.

## File S2: Statistical Downscaling

Statistical downscaling was carried out to translate the outputs from the global climate models into useful information on a regional scale. This process generates precipitation and temperature series from the statistical properties predicted by the global climatic model. Downscaling output for future climate change scenarios (temperature and precipitation) involves three steps [1,2]. Firstly, a stochastic weather generator is developed and parameter calibration is carried out to reproduce the statistics of the observed data (1984–2008). Secondly, changes in monthly rainfall (mean and standard deviation) between a control period (1971–2000) and the future scenarios predicted by the GCM are calculated. Thirdly, perturbation of the stochastic weather generator based on GCM predictions is developed.

For weather generation in the climate change scenario, a model suite was developed that comprised a stochastic daily rainfall generator and a stochastic mean daily temperature generator.

The rainfall generator is based on the well-known chain-dependent-process stochastic model for daily precipitation [3–5], which is a two-state model: a first-order non-stationary Markov chain for modelling rainfall occurrences, and a probabilistic sub-model for modelling amounts of rainfall [6]. This rainfall generator is capable of dealing with seasonal non-stationarity by simply evaluating the probability transition matrix and the parameters of the probabilistic sub-model on a monthly basis.

$X_t$  represents the binary event of precipitation or no precipitation (precipitation refers to a rainfall event of more than 0.1 mm/day) occurring on day  $t$ :

$$X_t = \begin{cases} 0 & \text{if day } t \text{ is dry} \\ 1 & \text{if day } t \text{ is wet} \end{cases} \quad (1)$$

Then the time series of precipitation is:

$$Y_t = h_t \cdot X_t \quad (2)$$

where  $h_t$  represents non-zero precipitation.

The first-order Markov chain model for  $X_t$  follows from the assumption that the probability of a wet/dry day depends on whether there was a precipitation occurrence the previous day ( $t - 1$ ).

$$\begin{aligned} Pr\{X_t = 1 | X_{t-1} = 0\} &= p_{01} \\ Pr\{X_t = 1 | X_{t-1} = 1\} &= p_{11} \end{aligned} \quad (3)$$

Equivalently, the complementary conditional probabilities are:

$$\begin{aligned} Pr\{X_t = 0 | X_{t-1} = 0\} &= p_{00} \\ Pr\{X_t = 0 | X_{t-1} = 1\} &= p_{10} \end{aligned} \quad \text{with} \quad \begin{aligned} p_{00} &= 1 - p_{01} \\ p_{10} &= 1 - p_{11} \end{aligned} \quad (4)$$

Parameters  $p_{01}$  and  $p_{11}$  are the conditional probabilities of a wet day following a dry day and of a wet day following a wet day. Both the definition of the parameters and Equation (3) are defined completely by the Markov model.

If precipitation occurs, then the amount of precipitation falling on a wet day is determined by using a predefined distribution frequency. In this case, the non-zero precipitation amount  $h_t$  (*i.e.*, rainfall over 0.1 mm) was simulated using the Weibull distribution [7].

$$F(h) = 1 - \exp\left[-\left(\frac{h^\beta}{\alpha}\right)\right] \quad (5)$$

where  $\alpha$  and  $\beta$  are the distribution parameters estimated using the maximum likelihood estimation procedure. To incorporate the seasonality of precipitation events, parameters were independently estimated for each month.

The stochastic simulation of series  $X_t$  under first-order Markov dependence is a straightforward process. Output  $u_t$  from a uniform [0,1] random number generator was compared with the appropriate transition probability from Equations (3) and (4). A wet day was simulated if the random number was lower than a “critical” probability  $p_c$ :

$$X_t = \begin{cases} 1 & \text{if } u_t \leq p_c \\ 0 & \text{otherwise} \end{cases} \quad \text{with } p_c = \begin{cases} p_{01} & \text{if } X_{t-1} = 0 \\ p_{11} & \text{if } X_{t-1} = 1 \end{cases} \quad (6)$$

The temperature daily series was obtained by multiplying the mean monthly temperature for the daily proportional coefficient, defined as the ratio between the mean k-daily temperature and the mean j-monthly temperature. The temperature generator is based on the classical Autoregressive Moving Average model (ARMA) [6], particularly of first-order in both the autoregressive and moving average parts (ARMA (1,1) model):

$$y_k = \phi y_{k-1} + \varepsilon_k - \theta \varepsilon_{k-1} \\ y_k = \frac{t_k - \mu(t)_j}{\sigma(t)_j} \quad (7)$$

with:

$\mu(t)_j$  = monthly mean temp. for  $j^{\text{th}}$  month;

$\sigma(t)_j$  = monthly standard deviation temp. for  $j^{\text{th}}$  month;

$\varepsilon_k$  = uncorrelated white noise process;

$t_k$  = daily average temperature for  $k^{\text{th}}$  day.

The model was used in a normalised form to handle the seasonal non-stationarity in the original temperature series [8]. The parameters of the model were obtained by maximum likelihood estimation.

In climate change scenarios, meteorological series were built as follows: future rainfall scenarios were generated by the perturbation of the Weibull distribution parameters using the new values for monthly variance and the mean predicted by the GCM future scenarios; the rainfall generator is based on the hypothesis that only the precipitation amounts are affected by climate change and not the probability transition matrix. The new temperature series were obtained by multiplying the normalised series by climate scenario variances and then adding the corresponding mean.

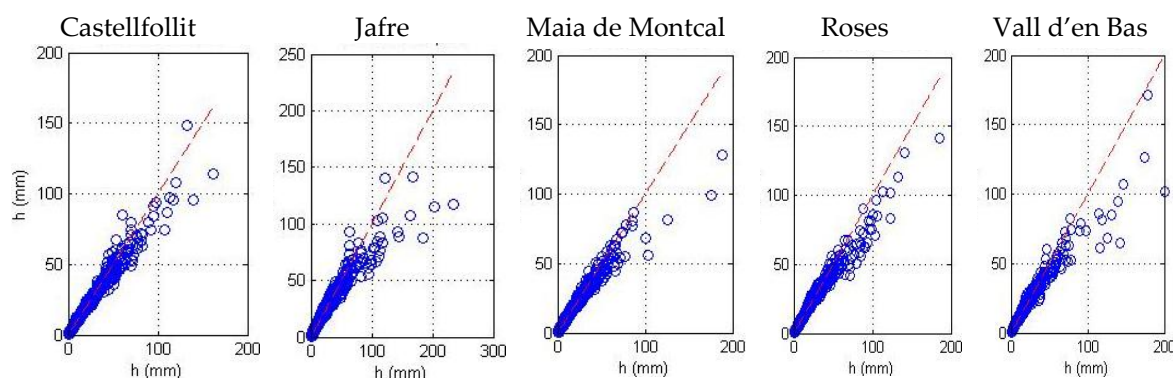

**Figure 1.** Results. Q-Q diagram of precipitation. Comparison of the historical period (meteorological stations in the area) and the Weibull-simulated data.

## References

1. Aronica, G.; Corrao, C.; Amengual, A.; Alonso, S.; Romero, R. Water resources evaluation under climatic trend effects in mediterranean catchments. *Geophys. Res. Abstr.* **2005**, *7*, 04091.
2. Bouraoui, F.; Vachaud, G.; Li, L.Z.X.; Le Treut, H.; Chen, T. Evaluation of the impact of climate changes on water storage and groundwater recharge at the watershed scale. *Clim. Dyn.* **1999**, *15*, 153–161, doi:10.1007/s003820050274.

3. Chapman, T. Stochastic models for daily rainfall in Western Pacific. *Math. Comput. Simul.* **1997**, *43*, 351–358, doi:10.1016/S0378-4754(97)00019-0.
4. Wilks, D.S. Adapting stochastic weather generation algorithms for climate change studies. *Clim. Chang.* **1992**, *22*, 67–84, doi:10.1007/BF00143344.
5. Kottegoda, N.T.; Natale, L.; Raiteri, E. A parsimonious approach to stochastic multisite modelling and disaggregation of daily rainfall. *J. Hydrol.* **2003**, *274*, 47–61, doi:10.1016/S0022-1694(02)00356-6.
6. Maidment, D.R. *Handbook of Hydrology*; McGraw-Hill, Inc.: New York, NY, USA, 1993; p. 1424.
7. Kottegoda, N.T.; Rosso, R. *Statistics, Probability and Reliability for Civil and Environmental Engineers*; McGraw-Hill International: New York, NY, USA, 1997; p. 768.
8. Bras, R.L.; Rodriguez-Iturbe, I. *Random Functions and Hydrology*; Dover Publications, Inc.: New York, NY, USA, 1993; p. 559.

## File S3: The Visual BALAN Numerical Model

Visual BALAN v. 2.0 [1], is a computer code suitable for long-term simulation of water balance in the soil, vadose zone and aquifer and similar to other existing codes, like INFIL [2] or SAHYSMOD [3] among others. The code comprises three sub-models for processes in (1) the upper part of the soil (root zone); (2) the vadose or unsaturated zone (lower soil) and (3) the saturated zone (aquifer). The approach assumes a cascade model for precipitation, interception, runoff, evapotranspiration and the recharge process. The state variable in each of the three zones is water volume, expressed as volume per surface unit (e.g., L/m<sup>2</sup>) or equivalent height of water (e.g., mm).

For vegetated soil the water balance is represented by:

$$P + Ir - In - E_s - ET_a - P_e = \Delta\theta$$

where P is precipitation; Ir irrigation; In canopy interception; E<sub>s</sub> runoff; ET<sub>a</sub> actual evapotranspiration; P<sub>e</sub> potential recharge to the vadose zone and  $\Delta\theta$  variation of soil water storage.

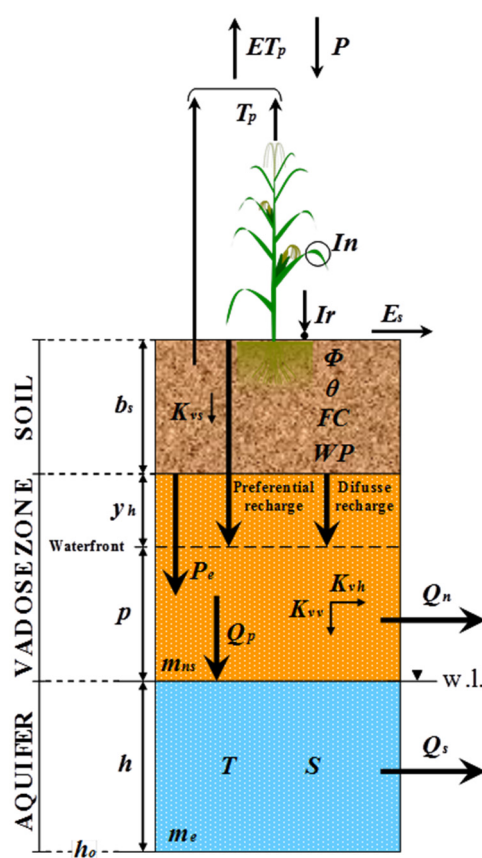

**Figure 1.** Balance components as defined in Visual Balan. The three soil components and hydrologic processes. (K) hydraulic conductivity; (Φ) drainable porosity; (θ) water content; (FC) field capacity; (WP) wilting point; (bs) thickness; (yh) thickness of the waterfront; (Pe) potential recharge; (Qh) hypodermic flow; (Qp) recharge; (m) porosity; (w.l) water level; (h) groundwater level; (T) transmissivity; S storage coefficient, (Qs) groundwater flow.

In the vadose/unsaturated zone, potential recharge P<sub>e</sub>, constitutes the entry of water, which can be hypodermic flow Q<sub>h</sub> (constitutes baseflow) and vertical flow or percolation to the aquifer Q<sub>p</sub>, which constitutes the deep recharge.

## References

1. Samper, J.; Huguet, L.; Ares, J.; García-Vera, M.A. *User's Guide VisualBALAN v.2.0: Código Interactivo Para la Realización de Balances Hidrológicos y la Estimación de la Recarga*; Civil Engineering School of A Coruña: A Coruña, Spain, 2005; p. 150.
2. USGS. *Documentation of Computer Program INFIL3.0: A Distributed-Parameter Watershed Model to Estimate Net Infiltration Below The Root Zone*; USGS Scientific Investigations Report 2008-5006; Office of Ground Water, U.S. Geological Survey: Reston, VA, USA, 2008; p. 98.
3. ILRI. *SAHYSMOD Version 1.7. Spatial Agro-Hydro-Salinity Model: Description of Principles, User Manual, and Case Studies*; International Institute for Land Reclamation and Improvement: Wageningen, The Netherlands, 2005.



File S4: Sub-Basins Characteristics

**Table 1.** Characteristics of sub-basins defined in Figure 1.

| Sub-Basin | Area (km²) | Impervious Area (%) | Land_Use (%) |       |      |
|-----------|------------|---------------------|--------------|-------|------|
|           |            |                     | Forest       | Crops | Bush |
| W270      | 202.2      | 0.5                 | 93.6         | 1.5   | 4.4  |
| W280      | 138.01     | 1.8                 | 87.6         | 3.8   | 6.8  |
| W300      | 71.9       | 2.7                 | 85.5         | 1.5   | 10.3 |
| W320      | 242.02     | 8.5                 | 85.6         | 1.6   | 4.3  |
| W410      | 127.9      | 4.2                 | 75.8         | 19.9  | 0.1  |
| W430      | 131.3      | 1.9                 | 65.1         | 9.8   | 23.2 |
